# Supplementary material for: Unraveling the role of prenyl side-chain interactions in stabilizing the secondary carbocation in the biosynthesis of variexenol B
Source: publisher site journal article supplement (doi:10.3762/bjoc.19.107), 2023-09-28
Supplement: Additional file 1 [file 1860-5397-19-107-S1.pdf]

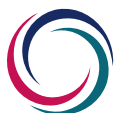

## Supporting Information

for

### **Unraveling the role of prenyl side-chain interactions in stabilizing the secondary carbocation in the biosynthesis of variexenol B**

Moe Nakano, Rintaro Gemma and Hajime Sato

*Beilstein J. Org. Chem.* **2023**, *19*, 1503–1510. [doi:10.3762/bjoc.19.107](https://doi.org/10.3762/bjoc.19.107)

**IRC plot, 3D representations of all computed structures, cartesian coordinates, energies, and imaginary frequencies**

## Contents

|                                                                    |    |
|--------------------------------------------------------------------|----|
| 1. IRC Plot .....                                                  | S1 |
| 2. 3D representation of all computed structures.....               | S5 |
| 3. Cartesian coordinates, energies, and imaginary frequencies..... | S8 |

# 1. IRC Plot

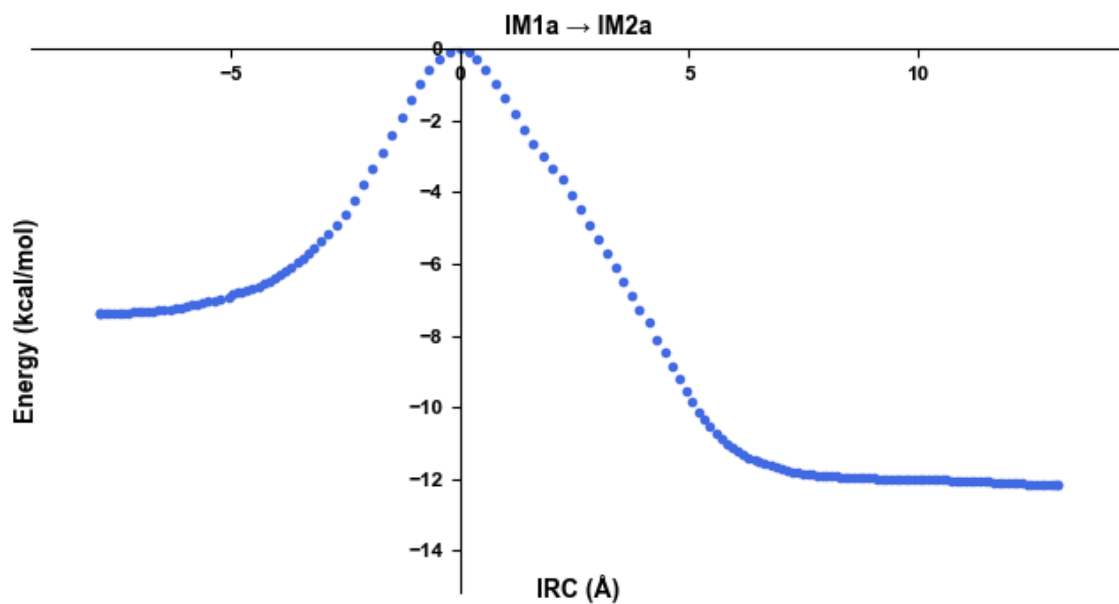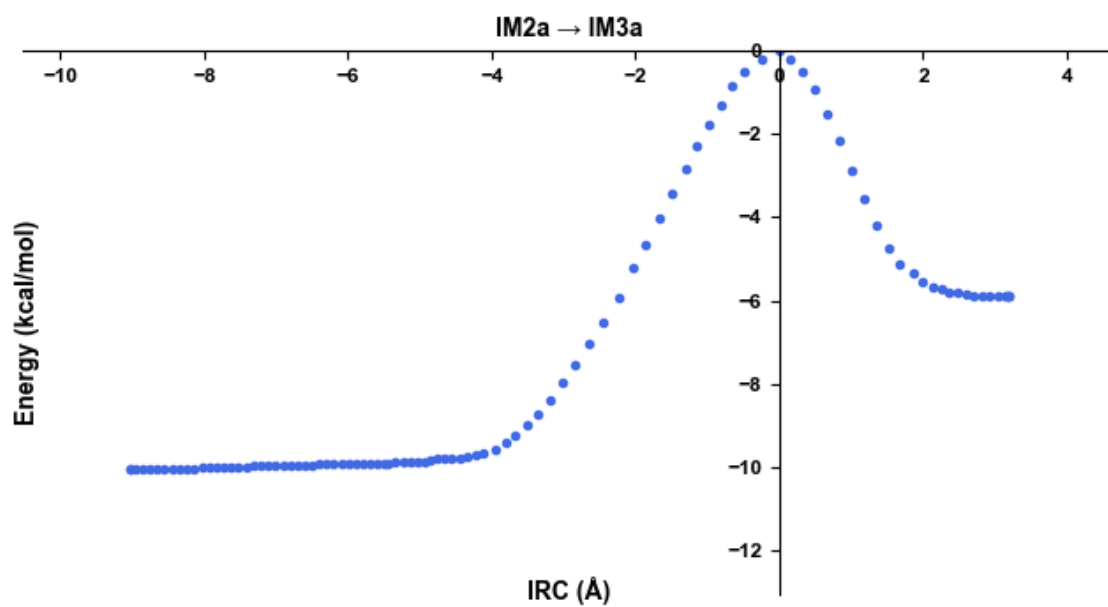

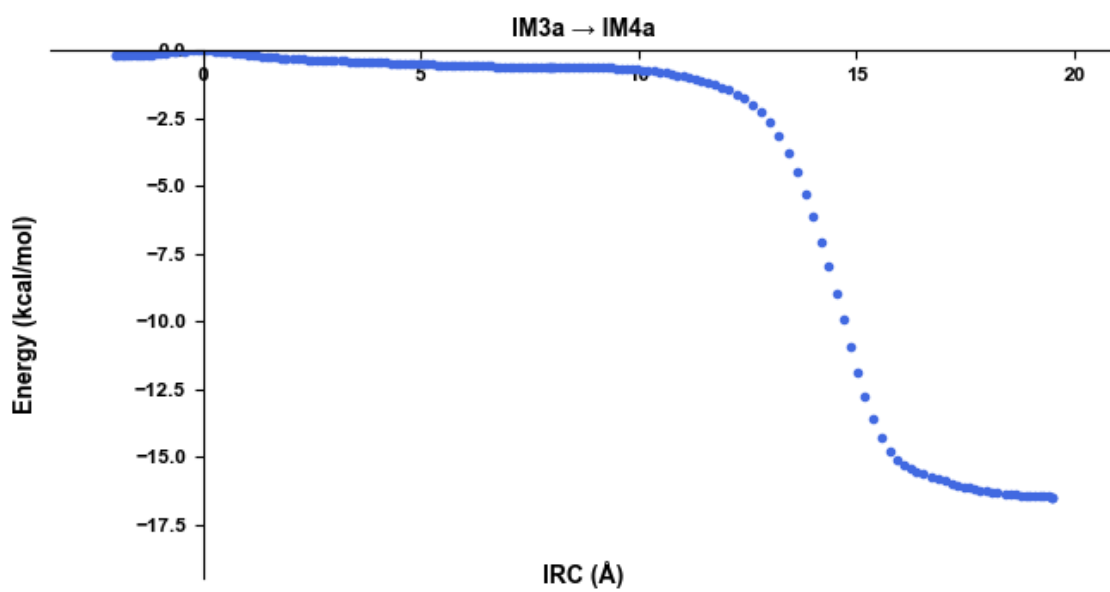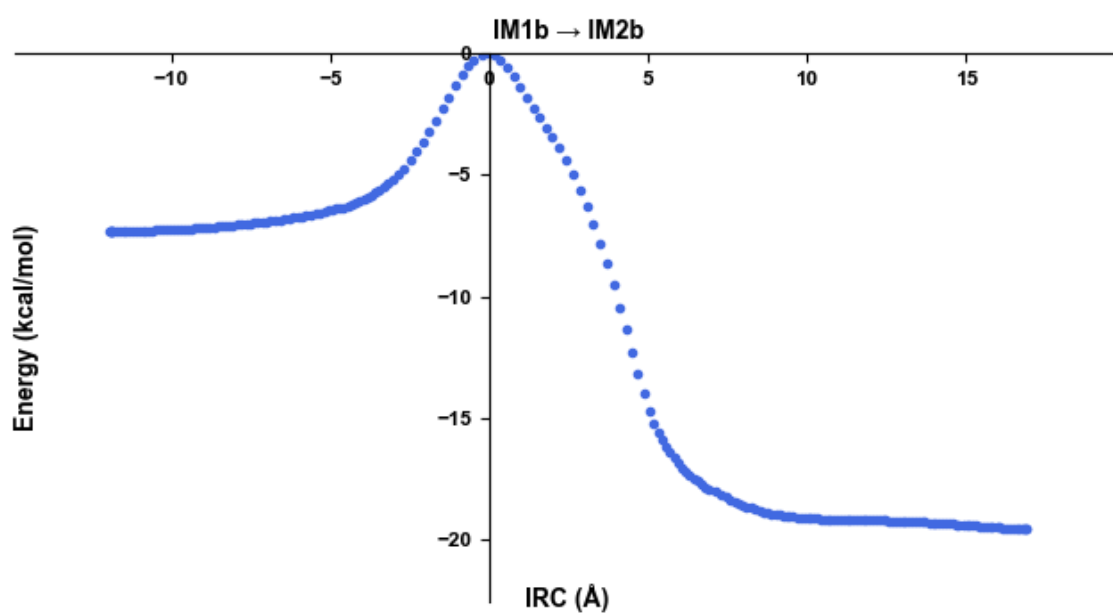

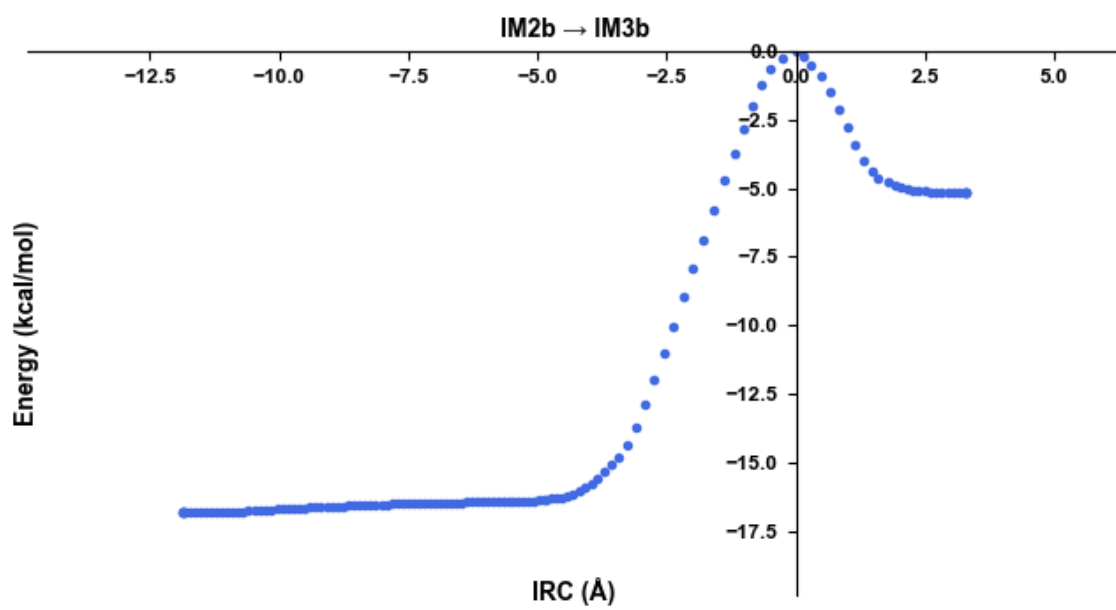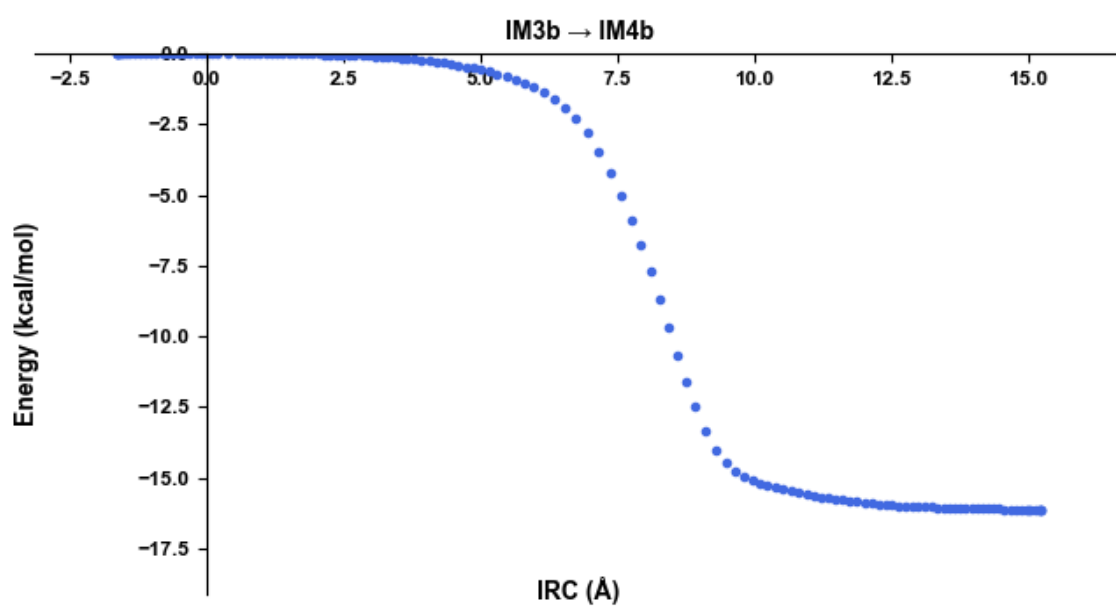

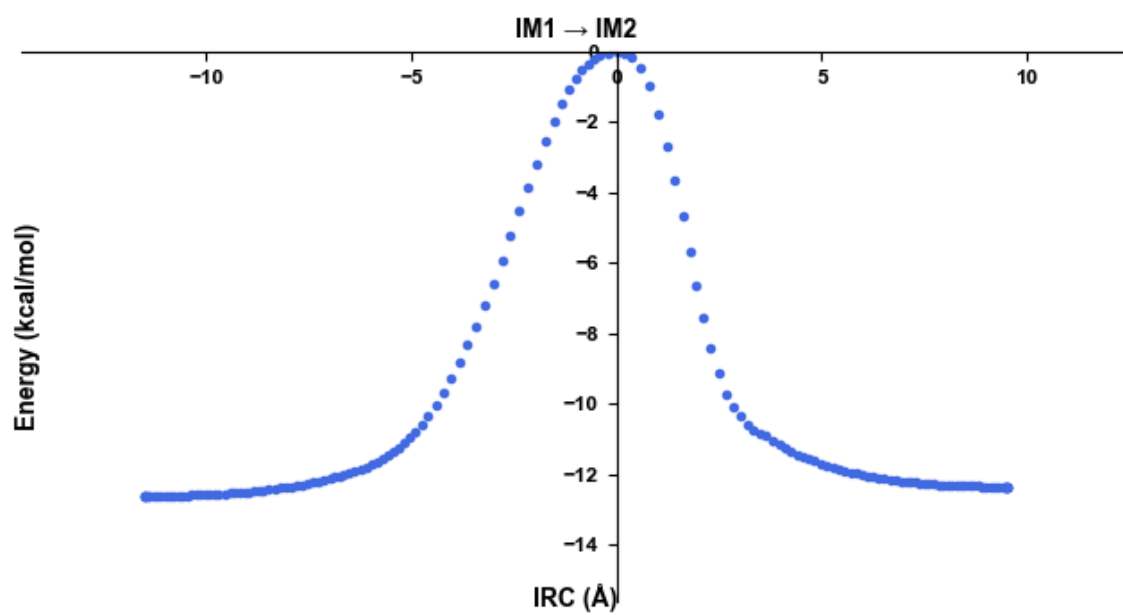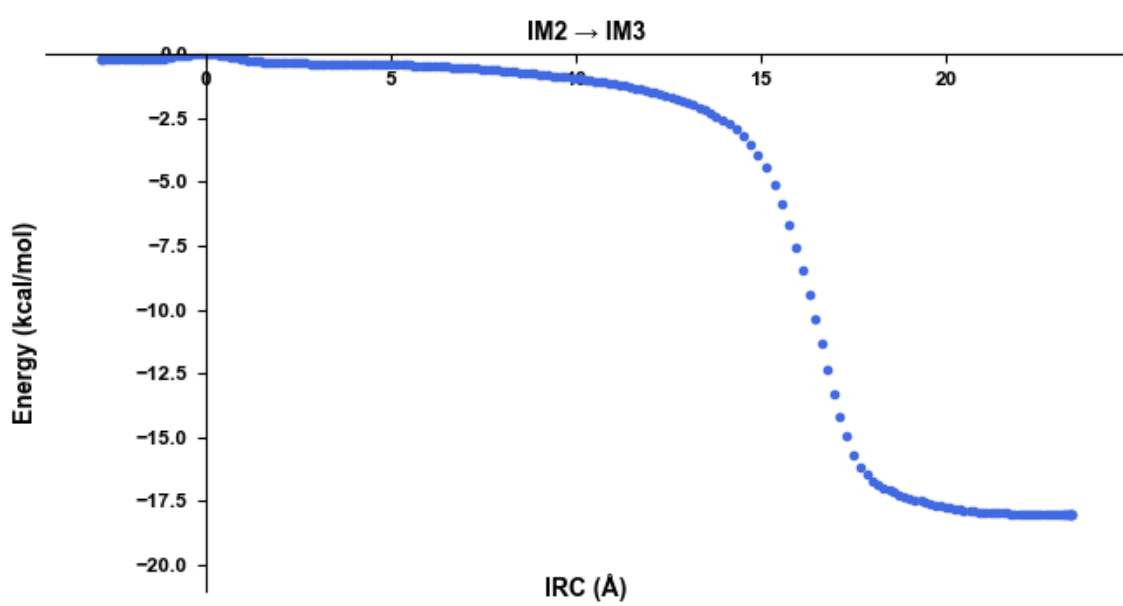

## 2. 3D representation of all computed structures

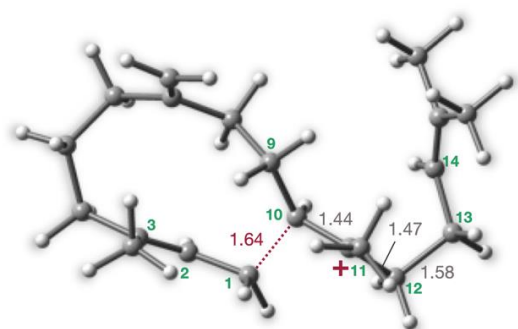

**IM1a**

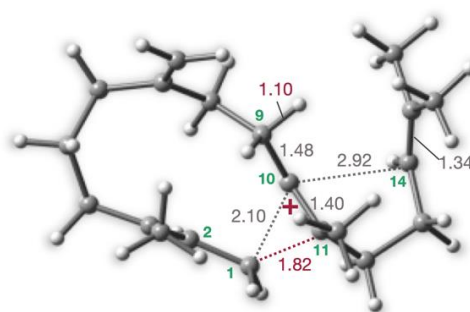

**TS\_1a-2a**

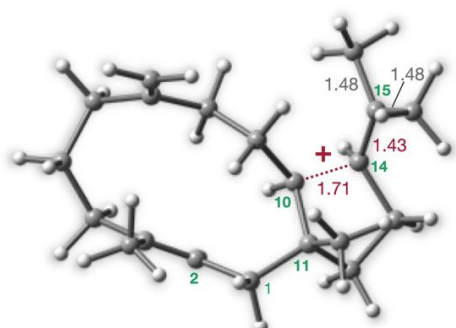

**IM2a**

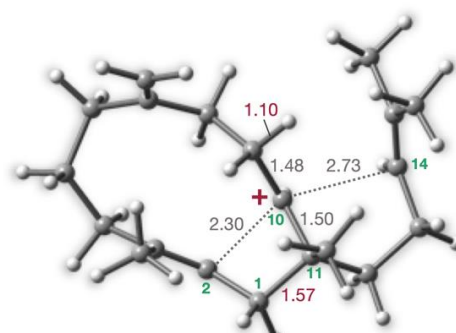

**TS\_2a-3a**

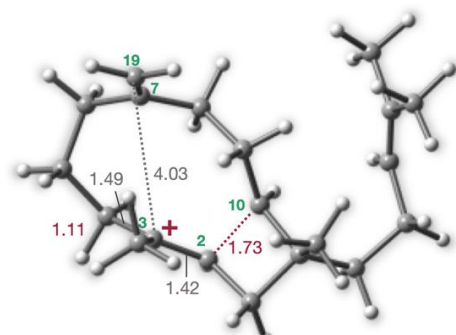

**IM3a**

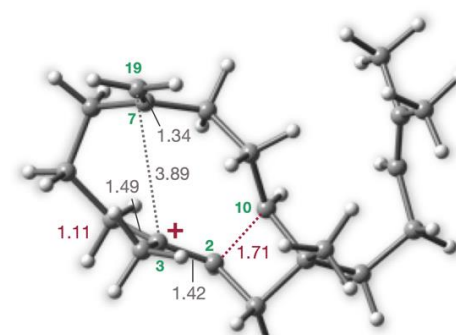

**TS\_3a-4a**

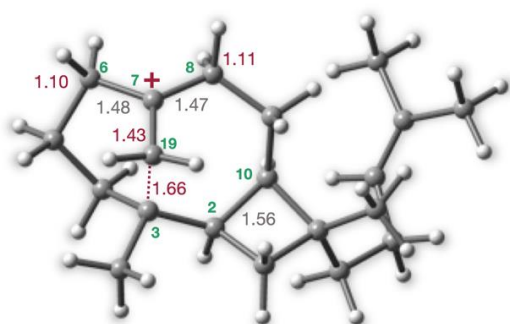

**IM4a**

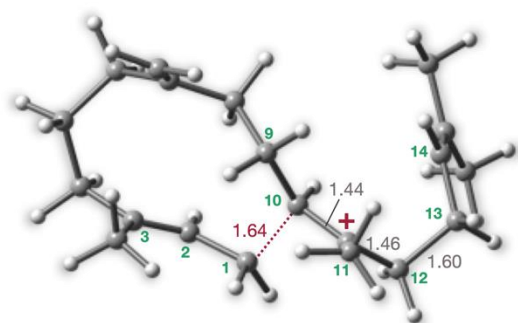

**IM1b**

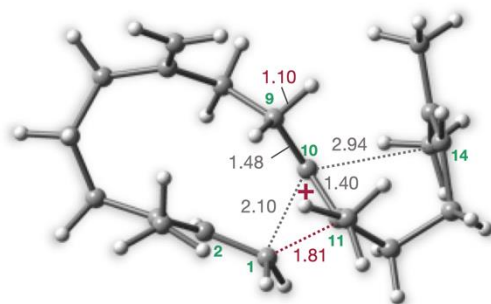

**TS\_1b-2b**

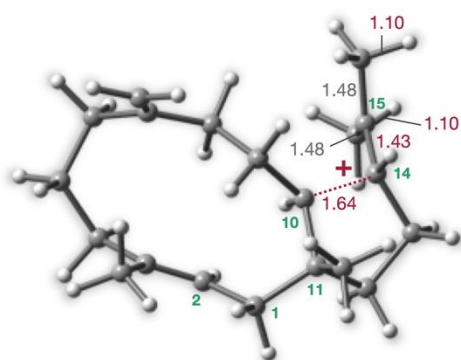

**IM2b**

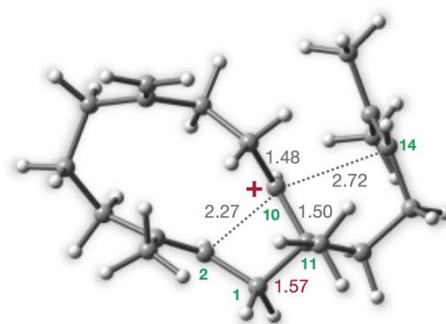

**TS\_2b-3b**

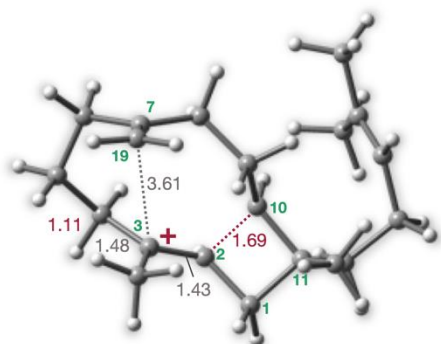

**IM3b**

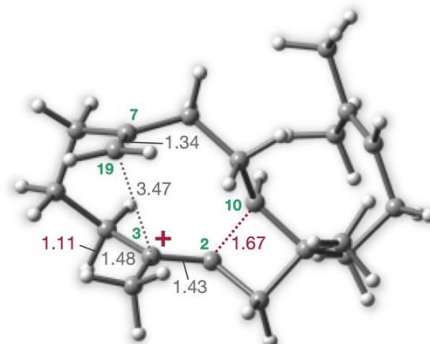

**TS\_3b-4b**

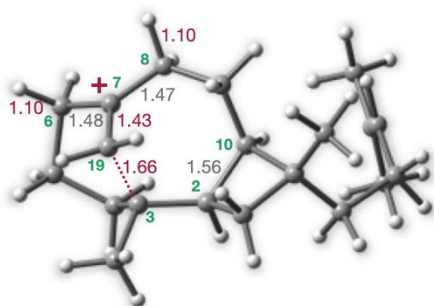

**IM4b**



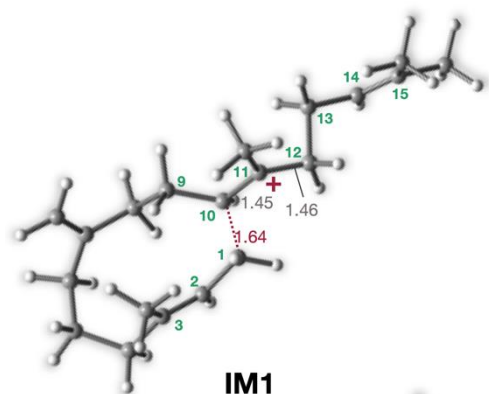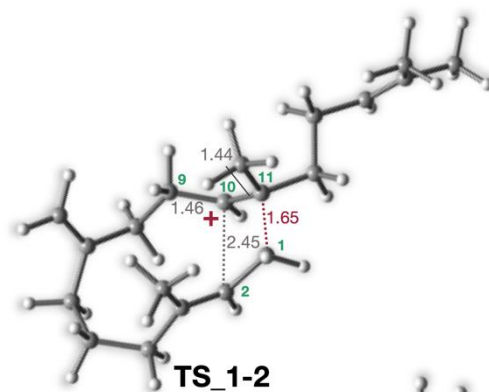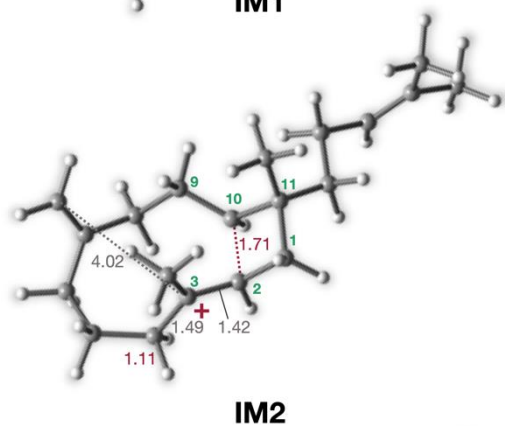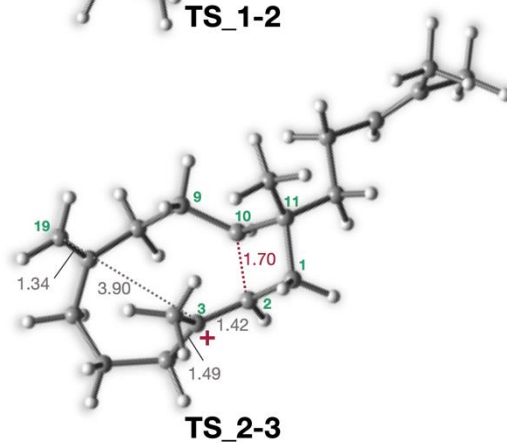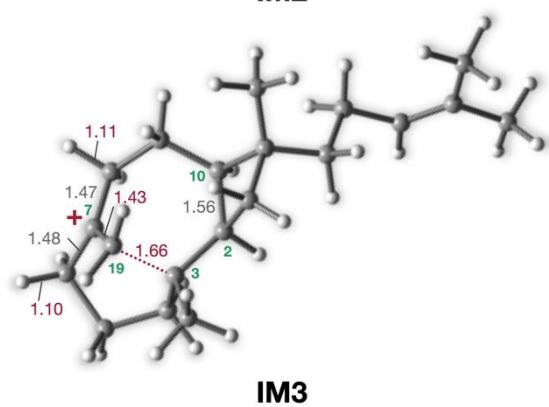

### 3. Cartesian coordinates, energies, and imaginary frequencies.

|                                                 |             |             |             |                                                 |             |             |             |
|-------------------------------------------------|-------------|-------------|-------------|-------------------------------------------------|-------------|-------------|-------------|
| IM1a                                            |             |             |             | H                                               | 3.97962200  | 3.37826800  | -0.85276400 |
| Sum of electronic and thermal Free Energies = - |             |             |             | H                                               | 2.70543400  | 2.57714100  | -1.79067800 |
| 781.126136                                      |             |             |             | H                                               | 2.40246500  | 3.11547600  | -0.12334100 |
| Number of imaginary frequencies = 0             |             |             |             | H                                               | 3.48289300  | 1.82507500  | 1.83347700  |
| -----                                           |             |             |             | H                                               | 4.57752100  | 0.46148200  | 1.50547700  |
| C                                               | -0.51201500 | -2.09154800 | -0.33147100 | H                                               | 5.05823100  | 2.11203100  | 1.12231500  |
| C                                               | -1.82281500 | -1.58884400 | -0.84363300 |                                                 |             |             |             |
| C                                               | -2.90480000 | -1.27516700 | -0.11093200 |                                                 |             |             |             |
| C                                               | -4.11960100 | -0.69686500 | -0.79645600 |                                                 |             |             |             |
| C                                               | -4.47187200 | 0.73736300  | -0.36018500 |                                                 |             |             |             |
| C                                               | -3.41706400 | 1.80853100  | -0.69917200 | IM2a                                            |             |             |             |
| C                                               | -2.17602700 | 1.78114000  | 0.17794500  | Sum of electronic and thermal Free Energies = - |             |             |             |
| C                                               | -0.87678000 | 1.29546800  | -0.44074100 | 781.125171                                      |             |             |             |
| C                                               | -0.04536900 | 0.36292500  | 0.46902200  | Number of imaginary frequencies = 0             |             |             |             |
| C                                               | 0.53016500  | -0.82828900 | -0.30839100 | -----                                           |             |             |             |
| C                                               | 1.67740900  | -1.49497700 | 0.25158600  | C                                               | 0.04282600  | -2.37072100 | 0.25686100  |
| C                                               | 2.66540100  | -2.14179500 | -0.62343400 | C                                               | -1.10462500 | -1.85380300 | -0.57468900 |
| C                                               | 3.90683800  | -1.16790700 | -0.62435800 | C                                               | -2.30464000 | -1.46152000 | -0.11552800 |
| C                                               | 3.51345500  | 0.23316200  | -1.00432400 | C                                               | -3.35917700 | -0.92341100 | -1.06317900 |
| C                                               | 3.61652500  | 1.34422600  | -0.25903000 | C                                               | -4.12991800 | 0.32450500  | -0.59243000 |
| C                                               | 3.14576800  | 2.67054400  | -0.79567800 | C                                               | -3.39741900 | 1.68029200  | -0.64960900 |
| C                                               | 4.21234000  | 1.41641000  | 1.12314700  | C                                               | -2.18178500 | 1.78704000  | 0.24693900  |
| C                                               | 1.90515900  | -1.49320900 | 1.70584400  | C                                               | -0.84847000 | 1.51481700  | -0.41769100 |
| C                                               | -2.22682000 | 2.19761900  | 1.44602300  | C                                               | 0.18557900  | 0.79029800  | 0.46177300  |
| C                                               | -3.02870000 | -1.45893200 | 1.37742000  | C                                               | 1.09424200  | -0.13443500 | -0.36025100 |
| H                                               | -3.89377100 | 2.78856500  | -0.59571100 | C                                               | 1.37404700  | -1.53673300 | 0.21541500  |
| H                                               | -4.98272100 | -1.33987500 | -0.58238800 | C                                               | 2.39547400  | -2.09939700 | -0.78081000 |
| H                                               | 4.38993000  | -1.21263600 | 0.35383300  | C                                               | 3.41485000  | -0.96989900 | -0.98851100 |
| H                                               | 0.70609600  | -0.58903800 | -1.36297100 | C                                               | 2.60376000  | 0.33534600  | -1.00337400 |
| H                                               | -1.86206100 | -1.42163300 | -1.91921400 | C                                               | 2.92374600  | 1.46495700  | -0.19343000 |
| H                                               | -0.59750500 | -2.49697800 | 0.67907700  | C                                               | 2.45031000  | 2.79886200  | -0.61285100 |
| H                                               | -0.10320900 | -2.86463400 | -0.98743900 | C                                               | 3.65024400  | 1.40576600  | 1.09083200  |
| H                                               | 0.78061000  | 0.92346500  | 0.92277500  | C                                               | 1.96041500  | -1.52134800 | 1.63191300  |
| H                                               | -0.67344900 | -0.00313000 | 1.28871600  | C                                               | -2.28549400 | 2.10418400  | 1.53972500  |
| H                                               | -0.26438200 | 2.16322400  | -0.71757900 | C                                               | -2.74509700 | -1.58993600 | 1.32261200  |
| H                                               | -1.10667300 | 0.78570900  | -1.37923600 | H                                               | -4.11816200 | 2.45433300  | -0.36739200 |
| H                                               | -1.35371500 | 2.19170800  | 2.09413800  | H                                               | -4.10237900 | -1.72024400 | -1.20437400 |
| H                                               | -3.14840200 | 2.57769300  | 1.87908300  | H                                               | 4.15069800  | -0.96842300 | -0.18139700 |
| H                                               | -3.13358100 | 1.71188500  | -1.75467400 | H                                               | 0.59737300  | -0.28424400 | -1.31969300 |
| H                                               | -3.97111400 | -0.71210400 | -1.88218800 | H                                               | -0.93521000 | -1.78677300 | -1.65165800 |
| H                                               | -4.68136900 | 0.76647800  | 0.71568400  | H                                               | -0.27251100 | -2.43469700 | 1.29999900  |
| H                                               | -5.40682700 | 1.00786600  | -0.86153000 | H                                               | 0.30200100  | -3.39389700 | -0.04592000 |
| H                                               | -3.96255400 | -1.98239100 | 1.60732400  | H                                               | 0.72517500  | 1.49040400  | 1.11084400  |
| H                                               | -2.20938300 | -2.02964000 | 1.81878800  | H                                               | -0.36568700 | 0.13737800  | 1.14790100  |
| H                                               | -3.07327200 | -0.48590000 | 1.87859200  | H                                               | -0.45162000 | 2.46612600  | -0.79979400 |
| H                                               | 2.28759200  | -2.24366800 | -1.64402200 | H                                               | -1.04079600 | 0.89579100  | -1.30061900 |
| H                                               | 2.98275000  | -3.11327500 | -0.23334400 | H                                               | -1.42140000 | 2.16283100  | 2.19676400  |
| H                                               | 2.54999700  | -2.30551900 | 2.04295200  | H                                               | -3.25139200 | 2.31828700  | 1.98909700  |
| H                                               | 2.42185800  | -0.53739600 | 1.90809900  | H                                               | -3.10657100 | 1.88641000  | -1.68796700 |
| H                                               | 0.97322800  | -1.45215400 | 2.27486800  | H                                               | -2.91629700 | -0.73839300 | -2.05032500 |
| H                                               | 4.60703400  | -1.59015700 | -1.35184200 | H                                               | -4.49746700 | 0.16839300  | 0.42837600  |
| H                                               | 3.09154200  | 0.33493600  | -2.00536400 | H                                               | -5.02067600 | 0.41598600  | -1.22273300 |
|                                                 |             |             |             | H                                               | -3.77748900 | -1.95395400 | 1.35914900  |

|   |             |             |             |
|---|-------------|-------------|-------------|
| H | -2.13579700 | -2.28550700 | 1.89958100  |
| H | -2.73471300 | -0.61753900 | 1.82787800  |
| H | 1.89411700  | -2.33582100 | -1.72797100 |
| H | 2.86656600  | -3.01830700 | -0.42061100 |
| H | 2.00563800  | -2.54651900 | 2.01172900  |
| H | 2.97695700  | -1.12336300 | 1.67322900  |
| H | 1.33310100  | -0.94588500 | 2.32135400  |
| H | 3.96866500  | -1.06822500 | -1.92460200 |
| H | 2.35595800  | 0.66802400  | -2.01334600 |
| H | 3.34605400  | 3.32232100  | -0.98699100 |
| H | 1.71746300  | 2.76350200  | -1.41836700 |
| H | 2.08678200  | 3.38945400  | 0.23479300  |
| H | 2.88923100  | 1.29087700  | 1.87997500  |
| H | 4.34219500  | 0.56915600  | 1.17148400  |
| H | 4.15698100  | 2.35333100  | 1.28930900  |

IM3a

Sum of electronic and thermal Free Energies = -  
781.124664

Number of imaginary frequencies = 0

-----

|   |             |             |             |
|---|-------------|-------------|-------------|
| C | 0.08397200  | -2.76754600 | 0.04265900  |
| C | -0.88102000 | -1.82203400 | -0.69287400 |
| C | -2.11318900 | -1.36411100 | -0.16414100 |
| C | -3.14606800 | -0.84458200 | -1.10078000 |
| C | -4.15244100 | 0.20950700  | -0.61699400 |
| C | -3.62094600 | 1.65317200  | -0.59759000 |
| C | -2.40254200 | 1.84944500  | 0.27621200  |
| C | -1.04496000 | 1.58371000  | -0.35824600 |
| C | -0.09771100 | 0.64639800  | 0.42668600  |
| C | 0.28054800  | -0.59019500 | -0.35874800 |
| C | 1.18065200  | -1.69572700 | 0.25683800  |
| C | 2.41879600  | -2.00615400 | -0.60050600 |
| C | 3.57335000  | -0.99837300 | -0.51149100 |
| C | 3.18251000  | 0.37660500  | -0.97647200 |
| C | 3.23313900  | 1.53015800  | -0.29424100 |
| C | 2.78050900  | 2.82178900  | -0.92549500 |
| C | 3.72924900  | 1.67901600  | 1.12020900  |
| C | 1.54340200  | -1.47552700 | 1.72190500  |
| C | -2.51320400 | 2.27003600  | 1.53917300  |
| C | -2.43247200 | -1.44121600 | 1.27608200  |
| H | -4.43203300 | 2.29820000  | -0.24805500 |
| H | -3.70151500 | -1.77584100 | -1.32983700 |
| H | 3.96897000  | -0.97907900 | 0.50724300  |
| H | 0.58720400  | -0.29737800 | -1.36608900 |
| H | -0.90743500 | -1.93373600 | -1.77733400 |
| H | -0.31904000 | -3.18509300 | 0.96766400  |
| H | 0.38980200  | -3.59410900 | -0.60309500 |
| H | 0.85828200  | 1.14478600  | 0.62330500  |
| H | -0.51141700 | 0.39963000  | 1.40966600  |
| H | -0.55165500 | 2.55123400  | -0.50377000 |
| H | -1.18892400 | 1.18925400  | -1.37136500 |

|   |             |             |             |
|---|-------------|-------------|-------------|
| H | -1.64283100 | 2.41992500  | 2.17380000  |
| H | -3.48092600 | 2.50449700  | 1.97408600  |
| H | -3.39080200 | 1.96350200  | -1.62467200 |
| H | -2.68120900 | -0.55962500 | -2.05144900 |
| H | -4.52964000 | -0.05702200 | 0.37603200  |
| H | -5.01279100 | 0.16886000  | -1.29099700 |
| H | -3.36023500 | -2.02024300 | 1.38814500  |
| H | -1.64714600 | -1.89641900 | 1.87541900  |
| H | -2.66069300 | -0.43728000 | 1.65428400  |
| H | 2.10231800  | -2.10537400 | -1.64960600 |
| H | 2.78326600  | -2.99616400 | -0.29684700 |
| H | 2.13015900  | -2.32517600 | 2.08601800  |
| H | 2.13894300  | -0.56803100 | 1.85697300  |
| H | 0.65582500  | -1.39009400 | 2.35692900  |
| H | 4.38581200  | -1.37387500 | -1.14542600 |
| H | 2.83030500  | 0.42605700  | -2.01005900 |
| H | 3.61270300  | 3.53079600  | -0.99590800 |
| H | 2.37631000  | 2.66810100  | -1.92928500 |
| H | 2.01334900  | 3.30759900  | -0.30811000 |
| H | 2.92506600  | 2.04170100  | 1.77469100  |
| H | 4.13039100  | 0.75840200  | 1.54523900  |
| H | 4.52014500  | 2.43577600  | 1.15929600  |

IM4a

Sum of electronic and thermal Free Energies = -  
781.149509

Number of imaginary frequencies = 0

-----

|   |             |             |             |
|---|-------------|-------------|-------------|
| C | -0.35878200 | -2.22030600 | 0.43206500  |
| C | -0.97933100 | -1.08497300 | -0.40308100 |
| C | -2.45662200 | -0.70503600 | -0.28414900 |
| C | -2.89395700 | 0.21504300  | -1.44934000 |
| C | -3.99052300 | 1.19603100  | -1.03147300 |
| C | -3.41972600 | 2.13438500  | 0.08115900  |
| C | -2.40990500 | 1.34680200  | 0.81835200  |
| C | -1.02783200 | 1.83473400  | 0.94961500  |
| C | 0.03365300  | 0.76480400  | 1.20047100  |
| C | 0.21692200  | -0.16988800 | 0.00682200  |
| C | 1.00891200  | -1.48339600 | 0.35601500  |
| C | 1.85231700  | -1.97967200 | -0.83048800 |
| C | 3.23102300  | -1.30958500 | -0.98128800 |
| C | 3.15121700  | 0.17889700  | -1.17736000 |
| C | 3.68814100  | 1.15341200  | -0.42941100 |
| C | 3.48012100  | 2.60324900  | -0.78914400 |
| C | 4.55178100  | 0.94038200  | 0.78684200  |
| C | 1.82954300  | -1.50427400 | 1.64184000  |
| C | -2.77764200 | 0.01432400  | 1.17694900  |
| C | -3.32116200 | -1.97251800 | -0.24919100 |
| H | -4.22645600 | 2.41236800  | 0.77301600  |
| H | -3.23605600 | -0.41542800 | -2.27553800 |
| H | 3.85785300  | -1.56225700 | -0.12232500 |
| H | 0.63801200  | 0.41399100  | -0.81743300 |

|   |             |             |             |
|---|-------------|-------------|-------------|
| H | -0.84587700 | -1.33774700 | -1.46284900 |
| H | -0.73316600 | -2.23823100 | 1.46425500  |
| H | -0.41499600 | -3.23414800 | 0.02470700  |
| H | 0.99073000  | 1.26488200  | 1.38488800  |
| H | -0.20309300 | 0.21970600  | 2.11946100  |
| H | -1.09416300 | 2.54162100  | 1.80157300  |
| H | -0.78678000 | 2.47131100  | 0.08763900  |
| H | -2.15824100 | -0.48576800 | 1.91863600  |
| H | -3.84390700 | -0.11400900 | 1.36405200  |
| H | -2.98530000 | 3.04513600  | -0.33528400 |
| H | -2.02893700 | 0.78163200  | -1.82191800 |
| H | -4.86561500 | 0.65789700  | -0.65553700 |
| H | -4.32603500 | 1.81083600  | -1.86834900 |
| H | -3.07161300 | -2.58400300 | -1.12270300 |
| H | -3.12859500 | -2.56693900 | 0.64740900  |
| H | -4.38786900 | -1.73319700 | -0.29090800 |
| H | 1.28898000  | -1.85195800 | -1.76539100 |
| H | 2.00516400  | -3.05971100 | -0.70912000 |
| H | 2.32893600  | -2.47393500 | 1.74502300  |
| H | 2.60131100  | -0.72909100 | 1.64106500  |
| H | 1.20943700  | -1.36601300 | 2.53185900  |
| H | 3.71951600  | -1.75778500 | -1.85527900 |
| H | 2.58284300  | 0.48909800  | -2.05787700 |
| H | 2.83811100  | 2.71720900  | -1.66660500 |
| H | 3.03028000  | 3.15160700  | 0.04857800  |
| H | 4.43686400  | 3.09314300  | -1.00164400 |
| H | 4.74984700  | -0.10982700 | 1.00422500  |
| H | 5.51747500  | 1.43879500  | 0.64778100  |
| H | 4.09246000  | 1.39631200  | 1.67335600  |

IM1b

Sum of electronic and thermal Free Energies = -  
781.128667

Number of imaginary frequencies = 0

-----

|   |             |             |             |
|---|-------------|-------------|-------------|
| C | -0.29611200 | -1.60379500 | -1.08053400 |
| C | -1.44532700 | -0.76898500 | -1.54248000 |
| C | -2.72041800 | -0.85299600 | -1.12623700 |
| C | -3.73538500 | 0.13604200  | -1.64768300 |
| C | -4.33287100 | 1.05926000  | -0.56969600 |
| C | -3.32873700 | 2.00627100  | 0.11519500  |
| C | -2.40299600 | 1.33647100  | 1.11775400  |
| C | -0.93720200 | 1.18998500  | 0.74811600  |
| C | -0.32058200 | -0.17947300 | 1.11401500  |
| C | 0.57235500  | -0.72282100 | -0.00996900 |
| C | 1.57529900  | -1.69833700 | 0.34345300  |
| C | 2.80739400  | -1.78572000 | -0.43446600 |
| C | 3.89141300  | -0.94603300 | 0.38098400  |
| C | 3.51055700  | 0.48882000  | 0.59682400  |
| C | 3.75168400  | 1.50398200  | -0.24716100 |
| C | 3.32941100  | 2.90764600  | 0.09126700  |
| C | 4.45165800  | 1.35682500  | -1.57094300 |

|   |             |             |             |
|---|-------------|-------------|-------------|
| C | 1.39496200  | -2.57044800 | 1.51903400  |
| C | -2.86502900 | 0.91625300  | 2.29836600  |
| C | -3.25304700 | -1.87677500 | -0.16064300 |
| H | -3.90240200 | 2.77998900  | 0.63556100  |
| H | -4.55811700 | -0.41865600 | -2.11627700 |
| H | 4.07012200  | -1.45121800 | 1.33429900  |
| H | 1.02946900  | 0.07867100  | -0.60389600 |
| H | -1.18747200 | 0.01242400  | -2.25631400 |
| H | -0.63003400 | -2.52105800 | -0.59010500 |
| H | 0.35767600  | -1.87023000 | -1.91501500 |
| H | 0.26572800  | -0.08854100 | 2.03511900  |
| H | -1.12316200 | -0.89579600 | 1.32181100  |
| H | -0.36206800 | 1.98430700  | 1.24091300  |
| H | -0.82752900 | 1.36845200  | -0.32413400 |
| H | -2.22431300 | 0.43904800  | 3.03594200  |
| H | -3.90672900 | 1.05144800  | 2.57758300  |
| H | -2.74001600 | 2.52200000  | -0.65376200 |
| H | -3.27890700 | 0.75275400  | -2.43026100 |
| H | -4.84821200 | 0.46648700  | 0.19529800  |
| H | -5.10234000 | 1.66847600  | -1.05492800 |
| H | -4.15243600 | -2.34264500 | -0.57661200 |
| H | -2.54256600 | -2.67220400 | 0.07204000  |
| H | -3.54455500 | -1.39639300 | 0.77977000  |
| H | 2.70333900  | -1.31688500 | -1.41638100 |
| H | 3.17242400  | -2.81207200 | -0.52089200 |
| H | 1.99804300  | -3.47775000 | 1.47691800  |
| H | 1.72620500  | -1.97964400 | 2.39068300  |
| H | 0.34155600  | -2.79724100 | 1.70437100  |
| H | 4.80581300  | -1.04365400 | -0.20824400 |
| H | 2.98969500  | 0.71557800  | 1.52838900  |
| H | 2.65282500  | 3.30214100  | -0.67511300 |
| H | 2.83062200  | 2.96283500  | 1.06121100  |
| H | 4.20058000  | 3.57105100  | 0.11364400  |
| H | 5.35850400  | 1.97073800  | -1.58530300 |
| H | 4.73536100  | 0.33043100  | -1.81000800 |
| H | 3.81073300  | 1.73012600  | -2.37748500 |

IM2b

Sum of electronic and thermal Free Energies = -  
781.136011

Number of imaginary frequencies = 0

-----

|   |             |             |             |
|---|-------------|-------------|-------------|
| C | 0.15797100  | -2.43863600 | -0.12582500 |
| C | -0.85375000 | -1.68606300 | -0.95239100 |
| C | -2.12546500 | -1.42273700 | -0.60906900 |
| C | -3.02601900 | -0.61810800 | -1.52692000 |
| C | -3.91440900 | 0.44909200  | -0.85905000 |
| C | -3.24147200 | 1.75841600  | -0.39930800 |
| C | -2.20011900 | 1.59482400  | 0.68709300  |
| C | -0.76766100 | 1.47596500  | 0.20991600  |
| C | 0.12363200  | 0.51918000  | 1.01966300  |
| C | 1.20302600  | -0.11425700 | 0.14719000  |

|   |             |             |             |
|---|-------------|-------------|-------------|
| C | 1.44083400  | -1.64475600 | 0.28978300  |
| C | 2.62418500  | -1.85078500 | -0.66308100 |
| C | 3.58932600  | -0.68869300 | -0.36042600 |
| C | 2.74525000  | 0.42839700  | 0.30527400  |
| C | 2.59793200  | 1.69977000  | -0.33041600 |
| C | 2.42276100  | 2.91327400  | 0.49198400  |
| C | 2.59356900  | 1.85369500  | -1.79884900 |
| C | 1.82458500  | -2.04150700 | 1.71893500  |
| C | -2.52747200 | 1.55520600  | 1.98058100  |
| C | -2.79318400 | -1.94943100 | 0.63778700  |
| H | -4.03214800 | 2.42409300  | -0.03891700 |
| H | -3.70351200 | -1.33071100 | -2.01728700 |
| H | 4.36017300  | -0.98416000 | 0.35522300  |
| H | 0.93615200  | 0.03605200  | -0.90306200 |
| H | -0.50800300 | -1.30983300 | -1.91827800 |
| H | -0.31826400 | -2.79842400 | 0.78823000  |
| H | 0.49928200  | -3.33315500 | -0.66396100 |
| H | 0.55012700  | 1.00206000  | 1.90816700  |
| H | -0.50748700 | -0.29048400 | 1.40318500  |
| H | -0.32973800 | 2.48575200  | 0.16929900  |
| H | -0.79826500 | 1.11932400  | -0.82570300 |
| H | -1.78744900 | 1.41449100  | 2.76419000  |
| H | -3.56013900 | 1.66320400  | 2.30089100  |
| H | -2.78892200 | 2.25208000  | -1.26978400 |
| H | -2.43108200 | -0.16074000 | -2.32829200 |
| H | -4.44121700 | 0.00866600  | -0.00475200 |
| H | -4.69004600 | 0.72585200  | -1.58087100 |
| H | -3.80122800 | -2.30212000 | 0.39441200  |
| H | -2.25894400 | -2.78285900 | 1.09356500  |
| H | -2.90722100 | -1.15869000 | 1.38808500  |
| H | 2.27194600  | -1.80078400 | -1.70121300 |
| H | 3.10010900  | -2.82580500 | -0.52706200 |
| H | 1.90874300  | -3.13080000 | 1.78010600  |
| H | 2.78511900  | -1.62519500 | 2.03879700  |
| H | 1.05976600  | -1.72986400 | 2.43736900  |
| H | 4.11497200  | -0.33616200 | -1.25086100 |
| H | 2.92447300  | 0.53423300  | 1.37814200  |
| H | 1.96771600  | 3.74544600  | -0.04557000 |
| H | 1.89311000  | 2.69994200  | 1.42492000  |
| H | 3.44283600  | 3.21019800  | 0.78934600  |
| H | 3.43557100  | 2.51039800  | -2.06436500 |
| H | 2.68069900  | 0.91483200  | -2.34369200 |
| H | 1.69174200  | 2.39608800  | -2.10748600 |

IM3b

Sum of electronic and thermal Free Energies = -  
781.122496

Number of imaginary frequencies = 0

-----  

|   |             |             |             |
|---|-------------|-------------|-------------|
| C | 0.18879500  | -2.54303600 | -0.48054000 |
| C | -0.57749100 | -1.32714200 | -1.02202700 |
| C | -1.97064000 | -1.10283300 | -0.80587000 |

|   |             |             |             |
|---|-------------|-------------|-------------|
| C | -2.67854700 | -0.15885800 | -1.70503300 |
| C | -3.86306900 | 0.66448100  | -1.18507200 |
| C | -3.44025100 | 1.83154600  | -0.28043000 |
| C | -2.57800000 | 1.37642400  | 0.87793900  |
| C | -1.07376100 | 1.56374200  | 0.74823000  |
| C | -0.20658500 | 0.36323200  | 1.17265800  |
| C | 0.38831300  | -0.38789800 | 0.00274300  |
| C | 1.23659300  | -1.67131100 | 0.25382000  |
| C | 2.56511400  | -1.63218900 | -0.51763100 |
| C | 3.69261900  | -0.81510400 | 0.13973200  |
| C | 3.29304800  | 0.57835200  | 0.56809000  |
| C | 3.12239600  | 1.63961500  | -0.23268000 |
| C | 2.68525200  | 2.97326700  | 0.31240800  |
| C | 3.32620600  | 1.59814100  | -1.72425000 |
| C | 1.43772200  | -2.06691100 | 1.71317400  |
| C | -3.13649000 | 0.87106600  | 1.98209300  |
| C | -2.70796100 | -1.92311500 | 0.17941400  |
| H | -4.34718700 | 2.31533400  | 0.09340800  |
| H | -3.05805100 | -0.86205500 | -2.47497200 |
| H | 4.06144500  | -1.36077200 | 1.01374100  |
| H | 0.87307400  | 0.32766000  | -0.66417100 |
| H | -0.27911100 | -1.01839100 | -2.02634700 |
| H | -0.39972300 | -3.15854800 | 0.20393900  |
| H | 0.58583100  | -3.18193900 | -1.27402200 |
| H | 0.66605100  | 0.71264500  | 1.73765500  |
| H | -0.75616500 | -0.29701600 | 1.85158900  |
| H | -0.79982700 | 2.43999200  | 1.34704600  |
| H | -0.82607700 | 1.83648900  | -0.28569300 |
| H | -2.54791000 | 0.54145700  | 2.83432800  |
| H | -4.21679500 | 0.80198000  | 2.08398000  |
| H | -2.90532300 | 2.57980700  | -0.87614600 |
| H | -1.94982600 | 0.47105200  | -2.22851500 |
| H | -4.56812200 | 0.02058900  | -0.65084500 |
| H | -4.40027500 | 1.05412400  | -2.05434000 |
| H | -2.74592500 | -2.94465600 | -0.23211200 |
| H | -2.14958700 | -2.00112600 | 1.11746700  |
| H | -3.71554300 | -1.57017900 | 0.37987300  |
| H | 2.36970700  | -1.24447900 | -1.52838800 |
| H | 2.90950500  | -2.66658000 | -0.64614600 |
| H | 1.97345000  | -3.02109500 | 1.75798800  |
| H | 2.02435200  | -1.32685300 | 2.26406200  |
| H | 0.48516200  | -2.19956900 | 2.23541400  |
| H | 4.53342400  | -0.77507000 | -0.56110700 |
| H | 3.13141400  | 0.72811800  | 1.63645800  |
| H | 2.53822000  | 2.94257700  | 1.39510200  |
| H | 3.42768000  | 3.74745600  | 0.09000500  |
| H | 1.74762400  | 3.29637200  | -0.15891500 |
| H | 3.74286200  | 0.65136300  | -2.07280300 |
| H | 2.37638100  | 1.77009700  | -2.24930900 |
| H | 3.99968500  | 2.40239800  | -2.03881900 |

IM4b

Sum of electronic and thermal Free Energies = -  
781.15014

Number of imaginary frequencies = 0

-----  
C -0.34360900 -2.27670500 -0.34416000  
C -0.77059500 -0.83620900 -0.68219700  
C -2.24190000 -0.43255700 -0.79644200  
C -2.39147000 0.95926500 -1.45719700  
C -3.61041900 1.71995400 -0.93308400  
C -3.41594900 1.97486700 0.59684900  
C -2.61080000 0.84787300 1.11198500  
C -1.34575100 1.09230200 1.82270900  
C -0.33918300 -0.05743300 1.80320600  
C 0.22184500 -0.31999500 0.40667300  
C 0.96088400 -1.70432400 0.27941000  
C 2.09613900 -1.65658000 -0.75817500  
C 3.44317400 -1.11258000 -0.24691300  
C 3.36854400 0.26478400 0.36040300  
C 3.59355600 1.43333100 -0.25589100  
C 3.48748700 2.73955600 0.48756900  
C 3.96996200 1.56883800 -1.70780000  
C 1.42921700 -2.39577200 1.55620400  
C -2.99467300 -0.45866300 0.68318300  
C -3.01125700 -1.49152400 -1.59795200  
H -4.39494300 1.96769400 1.09516600  
H -2.46109700 0.81995400 -2.54017500  
H 3.85170000 -1.80644500 0.49599000  
H 0.82020700 0.54529100 0.10178300  
H -0.34150600 -0.58031400 -1.65924100  
H -0.97634000 -2.73423300 0.42797500  
H -0.24337100 -2.98219700 -1.17437100  
H 0.49185200 0.20564200 2.46556800  
H -0.79411100 -0.95247400 2.23894800  
H -1.68129100 1.31334500 2.85636900  
H -0.91013900 2.03677800 1.47034100  
H -2.58069400 -1.30064600 1.23391100  
H -4.06246800 -0.56549400 0.49192800  
H -2.92936200 2.93206400 0.79336800  
H -1.48833400 1.55813600 -1.27342900  
H -4.52553200 1.14542300 -1.10405600  
H -3.73573600 2.68125900 -1.43419100  
H -2.49742000 -1.64087900 -2.55338800  
H -3.04018400 -2.45041300 -1.07449500  
H -4.03676300 -1.17221700 -1.80573400  
H 1.78293600 -1.05453000 -1.62197400  
H 2.25392300 -2.67787600 -1.12897100  
H 1.89484900 -3.35464100 1.30383900  
H 2.17184800 -1.80216100 2.09834400  
H 0.60294600 -2.60934600 2.23978200  
H 4.14961600 -1.12492600 -1.08158200  
H 3.10177200 0.30619500 1.41904100  
H 3.21817600 2.58988100 1.53652600  
H 4.43903200 3.28196600 0.45503000  
H 2.73985200 3.39396800 0.02221000

H 3.99584100 0.61570900 -2.23764700  
H 3.25885900 2.22479200 -2.22378500  
H 4.95466400 2.04012400 -1.80336300

IM1

Sum of electronic and thermal Free Energies = -  
781.13016

Number of imaginary frequencies = 0

-----  
C -0.51930100 -1.48592400 0.07925800  
C -1.84923100 -1.54777300 -0.59731900  
C -3.05540200 -1.52620500 -0.00493700  
C -4.29915800 -1.51769100 -0.86101800  
C -5.14955700 -0.24059200 -0.72970500  
C -4.46290700 1.05701500 -1.19756200  
C -3.40062600 1.59178700 -0.25094000  
C -1.94777000 1.50066900 -0.68471900  
C -0.97450400 1.06644200 0.43527900  
C 0.05674500 0.04121300 -0.05691900  
C 1.27421100 -0.11092200 0.70675000  
C 2.50089900 -0.55626000 0.05397800  
C 3.35542100 0.76527200 -0.19387500  
C 4.58296900 0.42005000 -0.98585500  
C 5.76660000 0.05777600 -0.46920300  
C 6.93840900 -0.24210700 -1.36291800  
C 6.04561600 -0.07747900 1.00313500  
C 1.30322500 0.22242000 2.14377500  
C -3.74280300 2.15099700 0.91269000  
C -3.29307900 -1.51473800 1.48082900  
H -5.23860500 1.82038900 -1.31598000  
H -4.92441900 -2.37488300 -0.58098900  
H 2.74061500 1.48388700 -0.74465700  
H 0.28694400 0.15689100 -1.12342500  
H -1.81058400 -1.56764500 -1.68571700  
H -0.59075900 -1.73865200 1.13974400  
H 0.19591400 -2.16267800 -0.39497100  
H -0.45503900 1.94321000 0.83717300  
H -1.54654600 0.63374300 1.26358000  
H -1.63163100 2.47515800 -1.07727700  
H -1.87719800 0.80587300 -1.52478300  
H -3.00482000 2.54791900 1.60556600  
H -4.78449300 2.24893100 1.20707400  
H -4.03235300 0.89630900 -2.19384100  
H -4.02229900 -1.65360600 -1.91266400  
H -5.48968200 -0.11547500 0.30514800  
H -6.05125900 -0.38810100 -1.33286800  
H -4.02156500 -2.28880100 1.74350300  
H -2.39164100 -1.69108600 2.07086800  
H -3.71836800 -0.55373000 1.78999100  
H 2.31149600 -1.01903100 -0.91753300  
H 3.10145500 -1.21433500 0.68717600  
H 2.12467100 -0.25807800 2.67635200

|   |            |             |             |
|---|------------|-------------|-------------|
| H | 1.44556100 | 1.31498200  | 2.20515500  |
| H | 0.34337000 | 0.02641700  | 2.62952500  |
| H | 3.60360800 | 1.20937700  | 0.77310100  |
| H | 4.47506000 | 0.46518600  | -2.06760400 |
| H | 7.29614200 | -1.26385300 | -1.19551400 |
| H | 6.68619500 | -0.13006200 | -2.41891000 |
| H | 7.77297000 | 0.42875200  | -1.13250000 |
| H | 6.84873600 | 0.60582000  | 1.29929000  |
| H | 5.18016000 | 0.12398500  | 1.63826700  |
| H | 6.39982300 | -1.09050200 | 1.22338200  |

IM2

Sum of electronic and thermal Free Energies = -  
781.127151

Number of imaginary frequencies = 0

-----

|   |             |             |             |
|---|-------------|-------------|-------------|
| C | 0.09076500  | -2.17393100 | -0.06917500 |
| C | -1.02912300 | -1.41127300 | -0.80582100 |
| C | -2.37524200 | -1.34012900 | -0.35546300 |
| C | -3.44011300 | -1.01857100 | -1.34029300 |
| C | -4.70926300 | -0.28573200 | -0.88127500 |
| C | -4.55517900 | 1.23908400  | -0.75151000 |
| C | -3.48500300 | 1.66410700  | 0.22862700  |
| C | -2.06602000 | 1.80287800  | -0.30624900 |
| C | -0.96586800 | 1.09032900  | 0.51291100  |
| C | -0.24664100 | 0.00864100  | -0.26172300 |
| C | 0.81125300  | -0.89499000 | 0.42250900  |
| C | 2.19501500  | -0.71625700 | -0.21273300 |
| C | 2.84728400  | 0.65004400  | 0.04073000  |
| C | 4.12558100  | 0.80749800  | -0.74213200 |
| C | 5.35867300  | 0.50754900  | -0.31380800 |
| C | 6.55946200  | 0.69617000  | -1.20227900 |
| C | 5.67348800  | -0.03200900 | 1.05676300  |
| C | 0.86829900  | -0.78486700 | 1.94428200  |
| C | -3.78169100 | 1.94131900  | 1.50124300  |
| C | -2.76003100 | -1.62639600 | 1.04013900  |
| H | -5.52199400 | 1.64279800  | -0.43803400 |
| H | -3.72480600 | -2.04054800 | -1.66348800 |
| H | 2.15045200  | 1.44881700  | -0.25181500 |
| H | 0.11462600  | 0.42438900  | -1.20791000 |
| H | -0.96297200 | -1.41774600 | -1.89423100 |
| H | -0.26229600 | -2.83208800 | 0.72801900  |
| H | 0.67831000  | -2.76830200 | -0.77248000 |
| H | -0.17491600 | 1.79788600  | 0.79339500  |
| H | -1.36467800 | 0.71373200  | 1.46047700  |
| H | -1.83955800 | 2.87307500  | -0.36287300 |
| H | -2.03053600 | 1.45250800  | -1.34494500 |
| H | -3.02362500 | 2.25552200  | 2.21487300  |
| H | -4.80388600 | 1.89106100  | 1.86619800  |
| H | -4.34123000 | 1.66385400  | -1.74032000 |
| H | -3.00300700 | -0.55762100 | -2.23299000 |
| H | -5.06456500 | -0.70091600 | 0.06776800  |

|   |             |             |             |
|---|-------------|-------------|-------------|
| H | -5.48932400 | -0.49363800 | -1.61892300 |
| H | -3.58210400 | -2.35426200 | 1.03734700  |
| H | -1.94164100 | -1.99571900 | 1.65353500  |
| H | -3.17978100 | -0.71285100 | 1.48328900  |
| H | 2.11169600  | -0.87468200 | -1.29775700 |
| H | 2.85802300  | -1.50865200 | 0.15998500  |
| H | 1.59232100  | -1.50962000 | 2.33022600  |
| H | 1.18073700  | 0.20998900  | 2.27229400  |
| H | -0.09589400 | -1.00074300 | 2.41495100  |
| H | 3.03334800  | 0.78192800  | 1.11070300  |
| H | 4.01526200  | 1.17430000  | -1.76238800 |
| H | 7.08548400  | -0.25381400 | -1.34862200 |
| H | 6.28267300  | 1.09303700  | -2.18132800 |
| H | 7.27371700  | 1.38637300  | -0.73945700 |
| H | 6.33705800  | 0.65544300  | 1.59319000  |
| H | 4.78830100  | -0.20137000 | 1.67313200  |
| H | 6.21093200  | -0.98293700 | 0.96972500  |

IM3

Sum of electronic and thermal Free Energies = -  
781.151186

Number of imaginary frequencies = 0

-----

|   |             |             |             |
|---|-------------|-------------|-------------|
| C | 0.20991200  | 0.37391700  | -1.73701800 |
| C | 0.95236100  | -0.40753100 | -0.63543400 |
| C | 2.43190000  | -0.77650600 | -0.76094400 |
| C | 2.84205600  | -1.81720500 | 0.30887100  |
| C | 4.29945800  | -1.65601400 | 0.74377400  |
| C | 4.46721300  | -0.24925900 | 1.40494200  |
| C | 3.48663800  | 0.64190500  | 0.75106300  |
| C | 2.49172700  | 1.37665700  | 1.54851900  |
| C | 1.21372100  | 1.77999700  | 0.81304700  |
| C | 0.35504000  | 0.57825400  | 0.41923700  |
| C | -0.74988000 | 0.92077600  | -0.64401800 |
| C | -1.97960300 | 0.01570500  | -0.47887600 |
| C | -2.89494900 | 0.38741000  | 0.69749900  |
| C | -3.95295000 | -0.65966900 | 0.93021200  |
| C | -5.19107700 | -0.66806100 | 0.41947900  |
| C | -6.15171500 | -1.78827400 | 0.71959100  |
| C | -5.74493700 | 0.40520600  | -0.48069400 |
| C | -1.17339900 | 2.37834600  | -0.79522800 |
| C | 3.40490000  | 0.56590900  | -0.67196300 |
| C | 2.71284000  | -1.31686700 | -2.16998900 |
| H | 5.47879200  | 0.12941500  | 1.20462200  |
| H | 2.67098400  | -2.81720500 | -0.10077900 |
| H | -2.29268600 | 0.49859300  | 1.60990000  |
| H | -0.01700200 | 0.09742600  | 1.33343200  |
| H | 0.44359100  | -1.37057400 | -0.50640400 |
| H | 0.81839900  | 1.18150700  | -2.16534200 |
| H | -0.23054800 | -0.20239900 | -2.55582700 |
| H | 0.62919800  | 2.42642500  | 1.47448300  |
| H | 1.46755700  | 2.39680100  | -0.05473300 |

|   |             |             |             |
|---|-------------|-------------|-------------|
| H | 3.05566400  | 2.27020400  | 1.88516400  |
| H | 2.28722000  | 0.82031700  | 2.47268800  |
| H | 2.88015500  | 1.37156500  | -1.18096100 |
| H | 4.34624800  | 0.30579200  | -1.15605300 |
| H | 4.31309800  | -0.28410600 | 2.48503700  |
| H | 2.19227200  | -1.72208500 | 1.19022400  |
| H | 4.97028000  | -1.74885800 | -0.11533300 |
| H | 4.59449000  | -2.41869700 | 1.46637900  |
| H | 2.01218400  | -2.13382100 | -2.37203700 |
| H | 2.56688900  | -0.54784500 | -2.93260200 |
| H | 3.73075000  | -1.70859200 | -2.25449800 |
| H | -1.66634600 | -1.03037900 | -0.36106600 |
| H | -2.56695300 | 0.05093200  | -1.40636800 |
| H | -1.94306100 | 2.45803300  | -1.57053800 |
| H | -1.59629800 | 2.77839800  | 0.13145400  |
| H | -0.34379100 | 3.02461800  | -1.09564900 |
| H | -3.35487400 | 1.36292900  | 0.51565000  |
| H | -3.65630100 | -1.50300300 | 1.55440900  |
| H | -5.70858300 | -2.53775000 | 1.37913300  |
| H | -7.05723300 | -1.39941800 | 1.19903300  |
| H | -6.47020800 | -2.28385300 | -0.20447600 |
| H | -5.02154100 | 1.18646700  | -0.72127300 |
| H | -6.08939400 | -0.03712500 | -1.42227800 |
| H | -6.61848600 | 0.87811200  | -0.01779600 |

TS\_1a-2a

Sum of electronic and thermal Free Energies = -781.110369  
 Number of imaginary frequencies = 1  
 The magnitude of the imaginary frequency: -198.6041

|   |             |             |             |
|---|-------------|-------------|-------------|
| C | -0.15994700 | -2.24649000 | -0.42939500 |
| C | -1.45516500 | -1.64572600 | -0.87879400 |
| C | -2.53154300 | -1.37250000 | -0.12170800 |
| C | -3.79693200 | -0.88091600 | -0.78690200 |
| C | -4.39105900 | 0.43259300  | -0.25041100 |
| C | -3.61652700 | 1.71774200  | -0.59938800 |
| C | -2.29385600 | 1.86594400  | 0.12415900  |
| C | -1.03127000 | 1.48212600  | -0.62750900 |
| C | -0.03316600 | 0.70638600  | 0.25103600  |
| C | 0.74620400  | -0.34851500 | -0.43950800 |
| C | 1.35425500  | -1.44247700 | 0.18285100  |
| C | 2.52679400  | -2.08241300 | -0.53755900 |
| C | 3.79659700  | -1.22317200 | -0.32417900 |
| C | 3.58770700  | 0.16102300  | -0.86791800 |
| C | 3.50883300  | 1.31873700  | -0.18913400 |
| C | 3.23425500  | 2.61464100  | -0.90571900 |
| C | 3.70637500  | 1.46494900  | 1.29630300  |
| C | 1.40329400  | -1.52020200 | 1.69349400  |
| C | -2.24588800 | 2.32387100  | 1.37841800  |
| C | -2.59953900 | -1.56761500 | 1.36707500  |
| H | -4.25419600 | 2.56895200  | -0.34194400 |

|   |             |             |             |
|---|-------------|-------------|-------------|
| H | -4.55260600 | -1.66659500 | -0.65218000 |
| H | 4.07212800  | -1.21494300 | 0.73325300  |
| H | 0.88033300  | -0.25962900 | -1.51975600 |
| H | -1.52130400 | -1.46038200 | -1.94902800 |
| H | -0.27634800 | -2.83693200 | 0.47966000  |
| H | 0.28151700  | -2.83535400 | -1.23051600 |
| H | 0.73279700  | 1.37547500  | 0.67737200  |
| H | -0.54277000 | 0.27445800  | 1.11764600  |
| H | -0.55430300 | 2.38742100  | -1.02223500 |
| H | -1.30476000 | 0.87906400  | -1.49672400 |
| H | -1.31268500 | 2.43492700  | 1.92528100  |
| H | -3.14958700 | 2.62744900  | 1.89966400  |
| H | -3.45971200 | 1.76141100  | -1.68447500 |
| H | -3.63277800 | -0.78955300 | -1.86702200 |
| H | -4.51963800 | 0.37575600  | 0.83717400  |
| H | -5.39682700 | 0.52544000  | -0.67245100 |
| H | -3.52996200 | -2.07612700 | 1.63944400  |
| H | -1.76624600 | -2.15150400 | 1.76571000  |
| H | -2.60928600 | -0.59630200 | 1.87618700  |
| H | 2.32068400  | -2.13828700 | -1.61260800 |
| H | 2.68162000  | -3.10287100 | -0.17270900 |
| H | 1.69062400  | -2.52667000 | 2.00864000  |
| H | 2.15659700  | -0.81925700 | 2.06621000  |
| H | 0.45232800  | -1.26635600 | 2.16512700  |
| H | 4.61668400  | -1.71530400 | -0.85744500 |
| H | 3.46770000  | 0.21123700  | -1.95239400 |
| H | 4.07036200  | 3.31021100  | -0.77675400 |
| H | 3.07196800  | 2.46712700  | -1.97573500 |
| H | 2.35161000  | 3.11159700  | -0.48199800 |
| H | 2.79224800  | 1.83917700  | 1.77674400  |
| H | 4.00798000  | 0.54282600  | 1.79456300  |
| H | 4.47929500  | 2.21562500  | 1.49201500  |

TS\_2a-3a

Sum of electronic and thermal Free Energies = -781.1152  
 Number of imaginary frequencies = 1  
 The magnitude of the imaginary frequency: -291.0430

|   |             |             |             |
|---|-------------|-------------|-------------|
| C | 0.11521500  | -2.61301400 | -0.02735600 |
| C | -1.02808300 | -1.89986000 | -0.74357700 |
| C | -2.18148800 | -1.45217300 | -0.18292600 |
| C | -3.29846800 | -0.93128600 | -1.06031300 |
| C | -4.16534400 | 0.22344600  | -0.52722700 |
| C | -3.56668200 | 1.64158900  | -0.58686000 |
| C | -2.32607200 | 1.83588200  | 0.25261200  |
| C | -1.00684100 | 1.51468000  | -0.42322800 |
| C | -0.02306000 | 0.71264400  | 0.44953600  |
| C | 0.63654700  | -0.36877200 | -0.30776900 |
| C | 1.28224600  | -1.59808100 | 0.24978200  |
| C | 2.51744000  | -1.99831500 | -0.58252500 |
| C | 3.65897500  | -0.97715500 | -0.51482000 |



|   |             |             |             |
|---|-------------|-------------|-------------|
| C | 3.17420200  | 0.35984600  | -0.99170900 |
| C | 3.10112100  | 1.51674700  | -0.30111000 |
| C | 2.55548800  | 2.76290700  | -0.94164100 |
| C | 3.55317300  | 1.70058700  | 1.11976700  |
| C | 1.59650300  | -1.48761200 | 1.74193400  |
| C | -2.38324300 | 2.27569400  | 1.51217500  |
| C | -2.47645000 | -1.54573400 | 1.28366900  |
| H | -4.33943500 | 2.33991800  | -0.25202900 |
| H | -3.96895400 | -1.79162500 | -1.20478400 |
| H | 4.06330200  | -0.92718900 | 0.49886600  |
| H | 0.67795100  | -0.24803500 | -1.38903400 |
| H | -0.96443700 | -1.86857100 | -1.83157800 |
| H | -0.21324500 | -3.04607700 | 0.91889800  |
| H | 0.48293200  | -3.42973500 | -0.65421800 |
| H | 0.77918400  | 1.34487700  | 0.86059000  |
| H | -0.51185000 | 0.29307400  | 1.33700000  |
| H | -0.53760200 | 2.44834500  | -0.75489700 |
| H | -1.21337300 | 0.94546300  | -1.33559800 |
| H | -1.49226300 | 2.41020500  | 2.12136600  |
| H | -3.33125000 | 2.53420000  | 1.97504900  |
| H | -3.34563100 | 1.89382800  | -1.63221400 |
| H | -2.90829900 | -0.68852000 | -2.05627100 |
| H | -4.47735700 | 0.01189200  | 0.50170200  |
| H | -5.08316200 | 0.23478800  | -1.12325600 |
| H | -3.44135100 | -2.04358200 | 1.43469500  |
| H | -1.71804500 | -2.09096200 | 1.84585900  |
| H | -2.57735700 | -0.54376400 | 1.71754900  |
| H | 2.20549700  | -2.12672300 | -1.62850700 |
| H | 2.85373200  | -2.98075700 | -0.23315400 |
| H | 2.06626900  | -2.41539800 | 2.08092300  |
| H | 2.28133700  | -0.66152000 | 1.95279400  |
| H | 0.69146000  | -1.33862500 | 2.33795700  |
| H | 4.47286800  | -1.32569200 | -1.16029900 |
| H | 2.87399100  | 0.39254500  | -2.04167700 |
| H | 3.34012300  | 3.52347300  | -1.02076600 |
| H | 2.15558700  | 2.57622000  | -1.94124800 |
| H | 1.76606900  | 3.20484500  | -0.31873800 |
| H | 2.70447900  | 1.96836000  | 1.76563600  |
| H | 4.04921200  | 0.82770400  | 1.54362000  |
| H | 4.24854300  | 2.54492100  | 1.17529200  |

TS\_3a-4a

Sum of electronic and thermal Free Energies = -  
781.123739

Number of imaginary frequencies = 1

The magnitude of the imaginary frequency: -100.3521

|   |             |             |             |
|---|-------------|-------------|-------------|
| C | 0.05211500  | -2.72719500 | 0.05828500  |
| C | -0.88132600 | -1.76161600 | -0.69368800 |
| C | -2.13080800 | -1.31459600 | -0.18812000 |
| C | -3.13829700 | -0.78934900 | -1.14692100 |
| C | -4.16333100 | 0.25966300  | -0.69739100 |

|   |             |             |             |
|---|-------------|-------------|-------------|
| C | -3.60690700 | 1.68985100  | -0.59939000 |
| C | -2.41613400 | 1.80841500  | 0.32599400  |
| C | -1.03707200 | 1.62134700  | -0.28983000 |
| C | -0.08251200 | 0.66981200  | 0.46563100  |
| C | 0.28382000  | -0.55514600 | -0.34511200 |
| C | 1.17406600  | -1.67850000 | 0.25700100  |
| C | 2.39004200  | -2.00900200 | -0.62408600 |
| C | 3.56440100  | -1.02251500 | -0.54842600 |
| C | 3.18919000  | 0.36439000  | -0.99051300 |
| C | 3.26503400  | 1.50831300  | -0.29456700 |
| C | 2.82058800  | 2.81354500  | -0.90336900 |
| C | 3.78421100  | 1.63329100  | 1.11396500  |
| C | 1.57097400  | -1.47031400 | 1.71503800  |
| C | -2.57370500 | 2.10091100  | 1.61979600  |
| C | -2.48079400 | -1.47790200 | 1.23916200  |
| H | -4.41523300 | 2.33815600  | -0.24950900 |
| H | -3.68380600 | -1.72136300 | -1.39852900 |
| H | 3.97999900  | -1.02118800 | 0.46251100  |
| H | 0.60327900  | -0.24072700 | -1.34163700 |
| H | -0.88886800 | -1.87416300 | -1.77860600 |
| H | -0.36568100 | -3.11439000 | 0.99019700  |
| H | 0.33552500  | -3.57483000 | -0.57048500 |
| H | 0.87696200  | 1.16267000  | 0.65980800  |
| H | -0.49009100 | 0.40744500  | 1.44699800  |
| H | -0.57345200 | 2.61115900  | -0.36905300 |
| H | -1.14482400 | 1.27972900  | -1.32676900 |
| H | -1.72931800 | 2.19272300  | 2.29849600  |
| H | -3.55875500 | 2.28664600  | 2.03989900  |
| H | -3.33331500 | 2.03914600  | -1.60253100 |
| H | -2.64314600 | -0.49902600 | -2.08069000 |
| H | -4.60755000 | -0.03222400 | 0.25967900  |
| H | -4.97855500 | 0.24943200  | -1.42653600 |
| H | -3.08501500 | -2.40000000 | 1.29334200  |
| H | -1.60893600 | -1.62735100 | 1.87502600  |
| H | -3.09122900 | -0.65909400 | 1.61698200  |
| H | 2.05384400  | -2.09594600 | -1.66820700 |
| H | 2.74202000  | -3.00715400 | -0.33261800 |
| H | 2.15328700  | -2.32995000 | 2.06267800  |
| H | 2.18205700  | -0.57219900 | 1.84182500  |
| H | 0.69914900  | -1.37587600 | 2.37015700  |
| H | 4.35743100  | -1.40546100 | -1.20212900 |
| H | 2.82356300  | 0.43234000  | -2.01834500 |
| H | 2.40176500  | 2.67767800  | -1.90371800 |
| H | 2.06695900  | 3.30022600  | -0.27028300 |
| H | 3.66036000  | 3.51339300  | -0.97538900 |
| H | 4.18292700  | 0.70319700  | 1.52031300  |
| H | 4.58322700  | 2.38159600  | 1.15049800  |
| H | 2.99409900  | 1.99499600  | 1.78586100  |

TS\_1b-2b

Sum of electronic and thermal Free Energies = -  
781.109647

Number of imaginary frequencies = 1  
The magnitude of the imaginary frequency: -196.7772

-----  
C -0.01723100 -2.02044300 -0.72142300  
C -1.26331100 -1.34221300 -1.20022500  
C -2.45700000 -1.30212600 -0.58437800  
C -3.63434300 -0.67536200 -1.29556800  
C -4.37506500 0.44381000 -0.54460900  
C -3.62729800 1.78528900 -0.42729900  
C -2.44247600 1.75869500 0.51653000  
C -1.05786200 1.61323100 -0.09094300  
C -0.15590700 0.65887800 0.71403600  
C 0.76858300 -0.18427400 -0.07859000  
C 1.31646800 -1.40003700 0.34107400  
C 2.62568000 -1.81397100 -0.30126700  
C 3.80538500 -1.12979600 0.43465100  
C 3.56521800 0.34335800 0.66105400  
C 3.61371800 1.30743700 -0.27360600  
C 3.31207900 2.74237800 0.06636000  
C 3.98064200 1.05724900 -1.71239000  
C 1.11762400 -1.87410200 1.76387400  
C -2.61596600 1.86989400 1.83664400  
C -2.73636000 -1.88849900 0.77095900  
H -4.34200800 2.53354700 -0.07128100  
H -4.35537800 -1.48138800 -1.48748200  
H 3.97381300 -1.62622700 1.39442800  
H 1.08310800 0.18182800 -1.05873300  
H -1.17653500 -0.87784300 -2.18049300  
H -0.23696300 -2.84781100 -0.04573600  
H 0.58234400 -2.35030500 -1.56735700  
H 0.51359600 1.21665400 1.39035700  
H -0.75880500 0.02554400 1.37146800  
H -0.58802100 2.60177700 -0.15670400  
H -1.15579000 1.25305000 -1.11785800  
H -1.78690800 1.85097300 2.53979800  
H -3.60608400 2.00875100 2.26199000  
H -3.30737800 2.10894000 -1.42569700  
H -3.31552700 -0.30327000 -2.27632100  
H -4.66230300 0.10423400 0.45781100  
H -5.30936700 0.62881300 -1.08422900  
H -3.67087600 -2.45820500 0.75187700  
H -1.94347400 -2.55141900 1.12611400  
H -2.86824500 -1.08854800 1.50965100  
H 2.63024200 -1.49887000 -1.35064100  
H 2.73555500 -2.90336600 -0.27562800  
H 1.39749100 -2.92738000 1.85015000  
H 1.76754900 -1.29669500 2.42999100  
H 0.09104200 -1.75702800 2.11493500  
H 4.70903000 -1.29937900 -0.15931900  
H 3.31732100 0.64382600 1.67989200  
H 2.50020600 3.12878600 -0.56233500  
H 3.03258900 2.86456800 1.11556600  
H 4.18451900 3.37464300 -0.13020800  
H 4.78217700 1.73779000 -2.01769500

H 4.31674900 0.03616000 -1.90160100  
H 3.13087400 1.27148100 -2.37401700

TS\_2b-3b

Sum of electronic and thermal Free Energies = -  
781.114363

Number of imaginary frequencies = 1

The magnitude of the imaginary frequency: -305.2444

-----  
C 0.33989200 -2.46460200 -0.51794500  
C -0.74243100 -1.58823300 -1.14306800  
C -1.99732500 -1.37580300 -0.66322000  
C -3.01897900 -0.66161600 -1.51860100  
C -4.05115400 0.24402700 -0.82525300  
C -3.57078500 1.64100900 -0.39230600  
C -2.47844500 1.62678100 0.65052600  
C -1.05268800 1.58150600 0.13237200  
C -0.13580100 0.60149900 0.88940100  
C 0.68781400 -0.23082900 -0.01272500  
C 1.31299200 -1.55827300 0.30912200  
C 2.73550900 -1.64550100 -0.27618300  
C 3.74099700 -0.72407400 0.42983300  
C 3.17811800 0.66138200 0.62269200  
C 3.00237500 1.58955100 -0.34113500  
C 2.42664100 2.94291000 -0.02879200  
C 3.39151800 1.37966300 -1.77909100  
C 1.28345400 -1.90158700 1.79860000  
C -2.75008400 1.66846100 1.95738500  
C -2.48277800 -1.92596300 0.64251000  
H -4.43626200 2.18197400 0.00156500  
H -3.58143400 -1.46992400 -2.01007100  
H 4.00726700 -1.14420700 1.40346300  
H 0.91350000 0.18100700 -0.99493600  
H -0.53693100 -1.22294000 -2.14930400  
H -0.08493200 -3.23351000 0.13076900  
H 0.89155000 -2.97218100 -1.31350000  
H 0.57086200 1.13166900 1.54456000  
H -0.70481400 -0.04494300 1.56729500  
H -0.63268900 2.59278000 0.17435700  
H -1.06983200 1.30770200 -0.92822800  
H -1.96956800 1.65387200 2.71459900  
H -3.77291100 1.73825600 2.31628600  
H -3.22926900 2.19390100 -1.27707200  
H -2.51464900 -0.11786700 -2.32667800  
H -4.47791400 -0.27074900 0.04303600  
H -4.87750900 0.38592300 -1.52858000  
H -3.43147200 -2.45373400 0.49205400  
H -1.77694700 -2.61288200 1.11009900  
H -2.69416200 -1.10963900 1.34418200  
H 2.68147700 -1.39012200 -1.34289400  
H 3.06248900 -2.69001000 -0.21979700  
H 1.75396200 -2.87746900 1.94976800

|   |            |             |             |
|---|------------|-------------|-------------|
| H | 1.82778400 | -1.16685200 | 2.39937700  |
| H | 0.26190400 | -1.96491300 | 2.18381500  |
| H | 4.66695700 | -0.69568900 | -0.15420600 |
| H | 2.91461400 | 0.94437500  | 1.64238800  |
| H | 1.60404100 | 3.18521700  | -0.71232000 |
| H | 2.07046000 | 3.01527300  | 1.00236500  |
| H | 3.18777100 | 3.71757900  | -0.17463400 |
| H | 4.01584400 | 2.21271900  | -2.11844900 |
| H | 3.94206000 | 0.45287100  | -1.94552100 |
| H | 2.50570900 | 1.38066700  | -2.42852000 |

TS\_3b-4b

Sum of electronic and thermal Free Energies = -  
781.121706

Number of imaginary frequencies = 1

The magnitude of the imaginary frequency: -9.8116

-----

|   |             |             |             |
|---|-------------|-------------|-------------|
| C | 0.07328200  | -2.52476000 | -0.45092900 |
| C | -0.58801600 | -1.24950100 | -0.98078100 |
| C | -1.99414400 | -0.98009100 | -0.92942500 |
| C | -2.52827000 | 0.11265400  | -1.77515200 |
| C | -3.69699100 | 0.96600600  | -1.26563900 |
| C | -3.26059800 | 1.96697200  | -0.18772900 |
| C | -2.58296600 | 1.28615600  | 0.98515900  |
| C | -1.08154000 | 1.45975200  | 1.15581900  |
| C | -0.27983200 | 0.16557600  | 1.38162400  |
| C | 0.33925400  | -0.40510300 | 0.12362300  |
| C | 1.19037200  | -1.71165200 | 0.24743500  |
| C | 2.45135100  | -1.63677700 | -0.62850600 |
| C | 3.63901000  | -0.87363800 | -0.01196600 |
| C | 3.30203100  | 0.50217400  | 0.51430900  |
| C | 3.18176700  | 1.62474000  | -0.20853800 |
| C | 2.83054100  | 2.93968700  | 0.43532900  |
| C | 3.36581700  | 1.67882200  | -1.70211700 |
| C | 1.51085900  | -2.19185400 | 1.65875200  |
| C | -3.30942900 | 0.59435900  | 1.86966900  |
| C | -2.89342100 | -1.89953200 | -0.20160300 |
| H | -4.14795100 | 2.50760700  | 0.15507700  |
| H | -2.87544600 | -0.46001500 | -2.65930200 |
| H | 4.05723700  | -1.47113300 | 0.80417300  |
| H | 0.83528700  | 0.39830100  | -0.42427100 |
| H | -0.17863200 | -0.91399300 | -1.93872600 |
| H | -0.54970900 | -3.05758600 | 0.27250100  |
| H | 0.39621500  | -3.22538500 | -1.22632200 |
| H | 0.57924100  | 0.38352500  | 2.02873300  |
| H | -0.87859900 | -0.57727000 | 1.92176200  |
| H | -0.92212800 | 2.12930100  | 2.00838700  |
| H | -0.66629600 | 1.98760300  | 0.28888900  |
| H | -2.86278000 | 0.10660600  | 2.73252300  |
| H | -4.39107900 | 0.52359300  | 1.78015700  |
| H | -2.59091600 | 2.71097000  | -0.63227100 |
| H | -1.70512300 | 0.74098100  | -2.13491500 |

|   |             |             |             |
|---|-------------|-------------|-------------|
| H | -4.49653100 | 0.32709300  | -0.87889700 |
| H | -4.11492600 | 1.50391800  | -2.12099300 |
| H | -2.83692400 | -2.86892500 | -0.72201000 |
| H | -2.51695100 | -2.08441700 | 0.80927700  |
| H | -3.92570000 | -1.56248600 | -0.15429800 |
| H | 2.18838700  | -1.17957300 | -1.59415200 |
| H | 2.77110300  | -2.66314800 | -0.85000300 |
| H | 2.02395200  | -3.15789700 | 1.60076000  |
| H | 2.16499000  | -1.49898300 | 2.19420600  |
| H | 0.60601600  | -2.33375400 | 2.25647800  |
| H | 4.42855200  | -0.81158500 | -0.76786000 |
| H | 3.14898600  | 0.58488800  | 1.59138800  |
| H | 2.67735500  | 2.83746700  | 1.51261200  |
| H | 3.62544100  | 3.67553000  | 0.27109000  |
| H | 1.91988400  | 3.36119100  | -0.00920500 |
| H | 3.69807400  | 0.73052600  | -2.12844500 |
| H | 2.42599000  | 1.96519100  | -2.19317500 |
| H | 4.09851100  | 2.44791700  | -1.96917100 |

TS\_1-2

Sum of electronic and thermal Free Energies = -  
781.108302

Number of imaginary frequencies = 1

The magnitude of the imaginary frequency: -153.7101

-----

|   |             |             |             |
|---|-------------|-------------|-------------|
| C | 0.00781700  | -1.68773000 | -0.26420100 |
| C | -1.38680000 | -1.48350400 | -0.84207300 |
| C | -2.55610100 | -1.51647100 | -0.17628400 |
| C | -3.85805500 | -1.46469800 | -0.94433000 |
| C | -4.94783700 | -0.51649300 | -0.41815000 |
| C | -4.73638000 | 0.98288000  | -0.69323700 |
| C | -3.57225400 | 1.59637500  | 0.05312400  |
| C | -2.25598000 | 1.70613400  | -0.69671900 |
| C | -1.03501900 | 1.37450600  | 0.18442600  |
| C | -0.02837400 | 0.51105600  | -0.41423500 |
| C | 0.86103200  | -0.38554200 | 0.27162100  |
| C | 2.27460400  | -0.44623500 | -0.33295700 |
| C | 3.14481200  | 0.76721100  | 0.02591100  |
| C | 4.46652800  | 0.71591800  | -0.69303800 |
| C | 5.61486300  | 0.22351700  | -0.20831800 |
| C | 6.86924500  | 0.22097600  | -1.04024600 |
| C | 5.77882700  | -0.35875600 | 1.17057600  |
| C | 0.85275700  | -0.31447100 | 1.79473400  |
| C | -3.70964500 | 2.04797800  | 1.30272500  |
| C | -2.66901500 | -1.69991900 | 1.31141600  |
| H | -5.65268600 | 1.50697600  | -0.40548800 |
| H | -4.26827300 | -2.48372500 | -0.91223500 |
| H | 2.61325200  | 1.68849200  | -0.25768500 |
| H | 0.10760900  | 0.58698500  | -1.49772500 |
| H | -1.42666600 | -1.38842800 | -1.92665500 |
| H | -0.01699500 | -2.33096000 | 0.61888000  |
| H | 0.63889300  | -2.14327300 | -1.02862600 |

|   |             |             |             |
|---|-------------|-------------|-------------|
| H | -0.41518400 | 2.27899300  | 0.37993800  |
| H | -1.31636300 | 1.01815800  | 1.17978800  |
| H | -2.16287700 | 2.71801300  | -1.10551900 |
| H | -2.27601300 | 1.02678100  | -1.55378000 |
| H | -2.89167600 | 2.49930700  | 1.85912700  |
| H | -4.66926100 | 2.00358600  | 1.80971600  |
| H | -4.61283100 | 1.13823300  | -1.77250900 |
| H | -3.65784700 | -1.24866200 | -2.00083400 |
| H | -5.09107400 | -0.66516500 | 0.65882800  |
| H | -5.88912300 | -0.80842100 | -0.89433600 |
| H | -3.48638900 | -2.38849600 | 1.54763600  |
| H | -1.75541200 | -2.09288600 | 1.76291500  |
| H | -2.91207200 | -0.74701600 | 1.79845500  |
| H | 2.20120100  | -0.53030700 | -1.42488600 |
| H | 2.75802500  | -1.36493600 | 0.02061200  |
| H | 1.52593200  | -1.08013600 | 2.19048900  |
| H | 1.20421500  | 0.65865800  | 2.14929600  |
| H | -0.14044300 | -0.49364800 | 2.21345900  |
| H | 3.29279400  | 0.81577500  | 1.10832100  |
| H | 4.46349300  | 1.09635700  | -1.71398500 |
| H | 7.24490000  | -0.80006200 | -1.16872400 |
| H | 6.70454200  | 0.65686400  | -2.02768400 |
| H | 7.66028500  | 0.78950100  | -0.53889100 |
| H | 6.51641200  | 0.21758200  | 1.73978600  |
| H | 4.85268600  | -0.38968100 | 1.74792600  |
| H | 6.16679500  | -1.38084900 | 1.09992000  |

TS\_2-3

Sum of electronic and thermal Free Energies = -  
781.126377

Number of imaginary frequencies = 1

The magnitude of the imaginary frequency: -87.4146

-----

|   |             |             |             |
|---|-------------|-------------|-------------|
| C | -0.07125600 | 2.13551900  | -0.07216000 |
| C | 0.99774400  | 1.32049300  | -0.82804900 |
| C | 2.36890900  | 1.27688000  | -0.44919800 |
| C | 3.37451100  | 0.89856100  | -1.47437900 |
| C | 4.68054900  | 0.20841300  | -1.06180700 |
| C | 4.53056800  | -1.29215500 | -0.76147300 |
| C | 3.51476200  | -1.58998800 | 0.31934200  |
| C | 2.07848000  | -1.83646300 | -0.12195100 |
| C | 0.99300900  | -1.06862900 | 0.66495600  |
| C | 0.24406000  | -0.05892400 | -0.17879800 |

|   |             |             |             |
|---|-------------|-------------|-------------|
| C | -0.81130900 | 0.88460800  | 0.46057700  |
| C | -2.18450300 | 0.69882000  | -0.19549800 |
| C | -2.86521100 | -0.64216200 | 0.11223800  |
| C | -4.11368800 | -0.83174000 | -0.71012200 |
| C | -5.36146400 | -0.51009700 | -0.34467300 |
| C | -6.52710700 | -0.73776000 | -1.27014700 |
| C | -5.72865100 | 0.09236600  | 0.98604900  |
| C | -0.90143500 | 0.83234800  | 1.98368000  |
| C | 3.87788900  | -1.67313600 | 1.60216300  |
| C | 2.80782600  | 1.70886900  | 0.89372600  |
| H | 5.51172000  | -1.67153800 | -0.46245900 |
| H | 3.62272400  | 1.89811500  | -1.88662700 |
| H | -2.16830800 | -1.46538200 | -0.10281800 |
| H | -0.13345100 | -0.55751600 | -1.07730400 |
| H | 0.86980200  | 1.27413000  | -1.91016500 |
| H | 0.33173300  | 2.78727300  | 0.70650000  |
| H | -0.66120000 | 2.74440800  | -0.76119800 |
| H | 0.21742500  | -1.75799500 | 1.02180800  |
| H | 1.41651400  | -0.61230300 | 1.56543700  |
| H | 1.89140100  | -2.91297000 | -0.04337200 |
| H | 1.98038400  | -1.61101600 | -1.19107900 |
| H | 3.16427800  | -1.89232200 | 2.39254500  |
| H | 4.91538400  | -1.55295000 | 1.90286900  |
| H | 4.25646300  | -1.81812300 | -1.68419200 |
| H | 2.88176400  | 0.37475500  | -2.30139500 |
| H | 5.12251300  | 0.71842900  | -0.19970600 |
| H | 5.38866100  | 0.33307800  | -1.88593200 |
| H | 3.20203500  | 2.73158600  | 0.76422200  |
| H | 1.99074500  | 1.76351900  | 1.61133200  |
| H | 3.61884800  | 1.09359900  | 1.28228300  |
| H | -2.07562900 | 0.80203900  | -1.28518200 |
| H | -2.84129500 | 1.51956600  | 0.12295000  |
| H | -1.62962400 | 1.57466200  | 2.32626200  |
| H | -1.22693900 | -0.14749900 | 2.34258500  |
| H | 0.05308300  | 1.06232400  | 2.46735800  |
| H | -3.09442300 | -0.70651200 | 1.17988800  |
| H | -3.96559100 | -1.24539400 | -1.70756500 |
| H | -6.21371500 | -1.18164900 | -2.21747600 |
| H | -7.26213200 | -1.40325600 | -0.80369000 |
| H | -7.04273200 | 0.20550000  | -1.48222100 |
| H | -4.86775000 | 0.29334800  | 1.62665500  |
| H | -6.26369400 | 1.03641000  | 0.83405700  |
| H | -6.41110100 | -0.57126000 | 1.52876300  |
